# Supplementary material
Source: PubMed Central journal article supplement (PMC2659670)

## Supplementary Figure S1

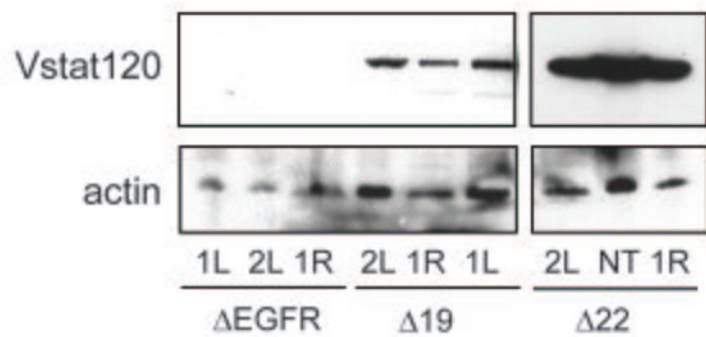

Supplement: NIHMS81676-supplement-1.pdf [file NIHMS81676-supplement-1.pdf]
